# Supplementary material for: ARID1A regulates R-loop associated DNA replication stress
Source: PLoS Genet. 2021 Apr 7;17(4):e1009238. doi: 10.1371/journal.pgen.1009238 (PMC8055027; doi:10.1371/journal.pgen.1009238)
Supplement: S1 Table — (XLSX) [file pgen.1009238.s007.xlsx]

## Sheet: Sheet1
Symbol	Gene	Sequence forward (5 to 3)	Sequence reverse ( 5 to 3)
BTBD	BTBD19	CCCCAAAGGGTGGTGACTT	TTCACATTACCCAGACCAGACTGT
MYADM	MYADM	CGTAGGTGCCCTAGTTGGAG	TCCATTCTCATTCCCAAACC
MEPCE	MEPCE	CTGAAGGAGCCTGAGAATGG	GGGCAGAAACGCCAGTATTA
3-TRIM	TRIM33	TATGGCCACCATGCACTAGA	GGCTGGAGATAGAGCCTGTG
5-TRIM	TRIM33	ATGCCCAGCTTTCCCTAACT	GGAAAGTGGACTGCATGGTT
CALM	CALM3	GAGGAATTGTGGCGTTGACT	AGAGTGGCCAAATGAGCAGT
GAPDH_PPP	GAPDH	CTCCTGTTCGACAGTCAGC	TTCAGGCCGTCCCTAGC
GAPDH_In5	GAPDH	ATAGGCGAGATCCCTCCAA	TGAAGACGCCAGTGGAC
GAPDH_TES	GAPDH	CCCTGTGCTCAACCAGT	CTCACCTTGACACAAGCC
